# Supplementary material for: Tamoxifen Activates Dormant Primordial Follicles in Mouse Ovaries
Source: PubMed Central journal article supplement (PMC9734234; doi:10.1007/s43032-022-00896-0), 2022-02-25
Supplement: 43032_2022_896_MOESM1_ESM.pdf [file 43032_2022_896_MOESM1_ESM.pdf]

**Supplementary Table 1** Number of FOXO3a nuclei and cytoplasmic localization in primordial follicles during the four stages of the estrous cycle

| mouse no. | Proestrus |           | Estrus |           | Metestrus |           | Diestrus |           |
|-----------|-----------|-----------|--------|-----------|-----------|-----------|----------|-----------|
|           | nuclei    | cytoplasm | nuclei | cytoplasm | nuclei    | cytoplasm | nuclei   | cytoplasm |
| 1         | 124       | 49        | 278    | 93        | 285       | 73        | 268      | 60        |
| 2         | 131       | 12        | 274    | 68        | 243       | 31        | 214      | 31        |
| 3         | 144       | 54        | 130    | 21        | 191       | 28        | 53       | 9         |
| 4         |           |           | 67     | 27        |           |           | 115      | 37        |
| 5         |           |           | 133    | 104       |           |           |          |           |



**Supplementary Table 3** Number of FOXO3a nuclei and cytoplasmic localization in primordial follicles and primary follicles during the estrous cycle following administration of 0.1 mg/g tamoxifen

| mouse no. | Proestrus Control |           | Proestrus Tamoxifen |           | Estrus Control |           | Estrus Tamoxifen |           | Metestrus Control |           | Metestrus Tamoxifen |           | Diestrus Control |           | Diestrus Tamoxifen |           |
|-----------|-------------------|-----------|---------------------|-----------|----------------|-----------|------------------|-----------|-------------------|-----------|---------------------|-----------|------------------|-----------|--------------------|-----------|
|           | nuclei            | cytoplasm | nuclei              | cytoplasm | nuclei         | cytoplasm | nuclei           | cytoplasm | nuclei            | cytoplasm | nuclei              | cytoplasm | nuclei           | cytoplasm | nuclei             | cytoplasm |
| 1         | 44                | 26        | 81                  | 49        | 10             | 3         | 32               | 15        | 52                | 21        | 45                  | 31        | 101              | 64        | 70                 | 61        |
| 2         | 47                | 17        | 66                  | 31        | 120            | 32        | 63               | 49        | 123               | 46        | 68                  | 77        | 88               | 41        | 47                 | 48        |
| 3         | 109               | 34        | 51                  | 33        | 97             | 47        | 1                | 1         | 61                | 41        | 67                  | 43        | 179              | 49        | 22                 | 23        |
| 4         | 14                | 5         | 109                 | 68        | 175            | 59        | 95               | 92        | 111               | 31        | 98                  | 55        | 26               | 8         | 77                 | 58        |
| 5         | 116               | 54        | 29                  | 35        | 124            | 38        | 65               | 46        | 134               | 51        | 38                  | 23        | 97               | 20        | 48                 | 33        |

**Supplementary Table 4** Number of FOXO3a nuclei and cytoplasmic localization in primordial follicles around antral follicles in ovaries treated with tamoxifen

| tamoxifen<br>(-) | Proestrus<br>around antral<br>follicle |           | Proestrus<br>except around<br>antral follicle |           | Estrus<br>around antral<br>follicle |           | Estrus<br>except around<br>antral follicle |           | Metestrus<br>around antral<br>follicle |           | Metestrus<br>except around<br>antral follicle |           | Diestrus<br>around antral<br>follicle |           | Diestrus<br>except around<br>antral follicle |           |
|------------------|----------------------------------------|-----------|-----------------------------------------------|-----------|-------------------------------------|-----------|--------------------------------------------|-----------|----------------------------------------|-----------|-----------------------------------------------|-----------|---------------------------------------|-----------|----------------------------------------------|-----------|
|                  | nuclei                                 | cytoplasm | nuclei                                        | cytoplasm | nuclei                              | cytoplasm | nuclei                                     | cytoplasm | nuclei                                 | cytoplasm | nuclei                                        | cytoplasm | nuclei                                | cytoplasm | nuclei                                       | cytoplasm |
| mouse<br>no.     |                                        |           |                                               |           |                                     |           |                                            |           |                                        |           |                                               |           |                                       |           |                                              |           |
| 1                | 22                                     | 9         | 22                                            | 17        | 6                                   | 2         | 4                                          | 1         | 34                                     | 9         | 18                                            | 12        | 51                                    | 10        | 50                                           | 54        |
| 2                | 21                                     | 2         | 26                                            | 15        | 47                                  | 5         | 73                                         | 27        | 53                                     | 8         | 70                                            | 38        | 60                                    | 9         | 28                                           | 32        |
| 3                | 40                                     | 5         | 69                                            | 29        | 42                                  | 7         | 55                                         | 40        | 27                                     | 5         | 34                                            | 36        | 69                                    | 7         | 110                                          | 42        |
| 4                | 7                                      | 0         | 7                                             | 5         | 41                                  | 4         | 134                                        | 55        | 54                                     | 7         | 57                                            | 24        | 19                                    | 5         | 7                                            | 3         |
| 5                | 79                                     | 5         | 37                                            | 49        | 37                                  | 4         | 87                                         | 34        | 57                                     | 14        | 77                                            | 37        | 59                                    | 12        | 38                                           | 8         |

| tamoxifen<br>(+) | Proestrus<br>around antral<br>follicle |           | Proestrus<br>except around<br>antral follicle |           | Estrus<br>around antral<br>follicle |           | Estrus<br>except around<br>antral follicle |           | Metestrus<br>around antral<br>follicle |           | Metestrus<br>except around<br>antral follicle |           | Diestrus<br>around antral<br>follicle |           | Diestrus<br>except around<br>antral follicle |           |
|------------------|----------------------------------------|-----------|-----------------------------------------------|-----------|-------------------------------------|-----------|--------------------------------------------|-----------|----------------------------------------|-----------|-----------------------------------------------|-----------|---------------------------------------|-----------|----------------------------------------------|-----------|
|                  | nuclei                                 | cytoplasm | nuclei                                        | cytoplasm | nuclei                              | cytoplasm | nuclei                                     | cytoplasm | nuclei                                 | cytoplasm | nuclei                                        | cytoplasm | Nuclei                                | cytoplasm | nuclei                                       | cytoplasm |
| mouse<br>no.     |                                        |           |                                               |           |                                     |           |                                            |           |                                        |           |                                               |           |                                       |           |                                              |           |
| 1                | 56                                     | 14        | 25                                            | 35        | 20                                  | 3         | 12                                         | 12        | 23                                     | 2         | 22                                            | 29        | 62                                    | 11        | 8                                            | 50        |
| 2                | 41                                     | 3         | 25                                            | 28        | 47                                  | 12        | 16                                         | 37        | 27                                     | 9         | 41                                            | 68        | 35                                    | 5         | 12                                           | 43        |
| 3                | 26                                     | 3         | 25                                            | 30        | 0                                   | 0         | 1                                          | 1         | 56                                     | 9         | 11                                            | 34        | 23                                    | 7         | 0                                            | 16        |
| 4                | 69                                     | 3         | 40                                            | 65        | 31                                  | 8         | 64                                         | 84        | 50                                     | 10        | 48                                            | 45        | 39                                    | 7         | 38                                           | 51        |
| 5                | 17                                     | 6         | 12                                            | 29        | 40                                  | 3         | 25                                         | 43        | 25                                     | 4         | 13                                            | 19        | 22                                    | 3         | 26                                           | 30        |

**Supplementary Table 5** Number of primordial follicles around which collagen type IV was digested during the estrous cycles

| mouse<br>no. | Proestrus<br>Control |            | Proestrus<br>Tamoxifen |            | Estrus<br>Control |            | Estrus<br>Tamoxifen |            | Metestrus<br>Control |            | Metestrus<br>Tamoxifen |            | Diestrus<br>Control |            | Diestrus<br>Tamoxifen |            |
|--------------|----------------------|------------|------------------------|------------|-------------------|------------|---------------------|------------|----------------------|------------|------------------------|------------|---------------------|------------|-----------------------|------------|
|              | digested             | undigested | digested               | undigested | digested          | undigested | digested            | undigested | digested             | undigested | digested               | undigested | digested            | undigested | digested              | undigested |
| 1            | 32                   | 37         | 86                     | 48         | 11                | 16         | 48                  | 19         | 24                   | 39         | 67                     | 22         | 55                  | 104        | 100                   | 28         |
| 2            | 25                   | 39         | 84                     | 44         | 103               | 91         | 85                  | 43         | 85                   | 70         | 107                    | 43         | 46                  | 68         | 106                   | 33         |
| 3            | 80                   | 45         | 64                     | 38         | 82                | 70         | 1                   | 2          | 50                   | 45         | 163                    | 17         | 105                 | 96         | 35                    | 6          |
| 4            | 22                   | 20         | 122                    | 39         | 101               | 106        | 151                 | 44         | 62                   | 72         | 161                    | 31         | 26                  | 28         | 126                   | 36         |
| 5            | 94                   | 52         | 61                     | 32         | 79                | 60         | 61                  | 30         | 96                   | 75         | 65                     | 12         | 52                  | 52         | 67                    | 14         |
